# Supplementary material for: Soft actuators based on the flexible MOF MIL-88B(Fe) with a fast response to various organic solvent vapours
Source: Royal Society of Chemistry journal article supplement (doi:10.1039/d3tc04521h), 2024-01-01
Supplement: d3tc04521h1.pdf [file d3tc04521h1.pdf]

## Supplementary Information (SI)

### Soft Actuators based on MIL-88B(Fe) flexible MOF with Fast Response to Various Organic Solvent Vapor

Shizhen Song, Tengfei Zheng, Bo Li, Hangcheng Yang, Qin-Xiang Jia,\* Zhuting Hao, Wen Zhang, and Ying Zhang

**Table S1.** Statistics of particle size from SEM data of MIL-88 series.

|               | MIL-88A |       | MIL-88B |       | MIL-88C |       | MIL-88D |       |
|---------------|---------|-------|---------|-------|---------|-------|---------|-------|
|               | Length  | Width | Length  | Width | Length  | Width | Length  | Width |
| Mean(nm)      | 452     | 290   | 251     | 117   | 1592    | 701   | 672     | 268   |
| Std Deviation | 70      | 32    | 231     | 91    | 795     | 471   | 768     | 212   |
| Min (nm)      | 278     | 191   | 70      | 26    | 496     | 78    | 72      | 72    |
| Max (nm)      | 703     | 400   | 844     | 340   | 4333    | 1979  | 5390    | 1165  |
| Points        | 100     | 100   | 100     | 100   | 100     | 100   | 100     | 100   |

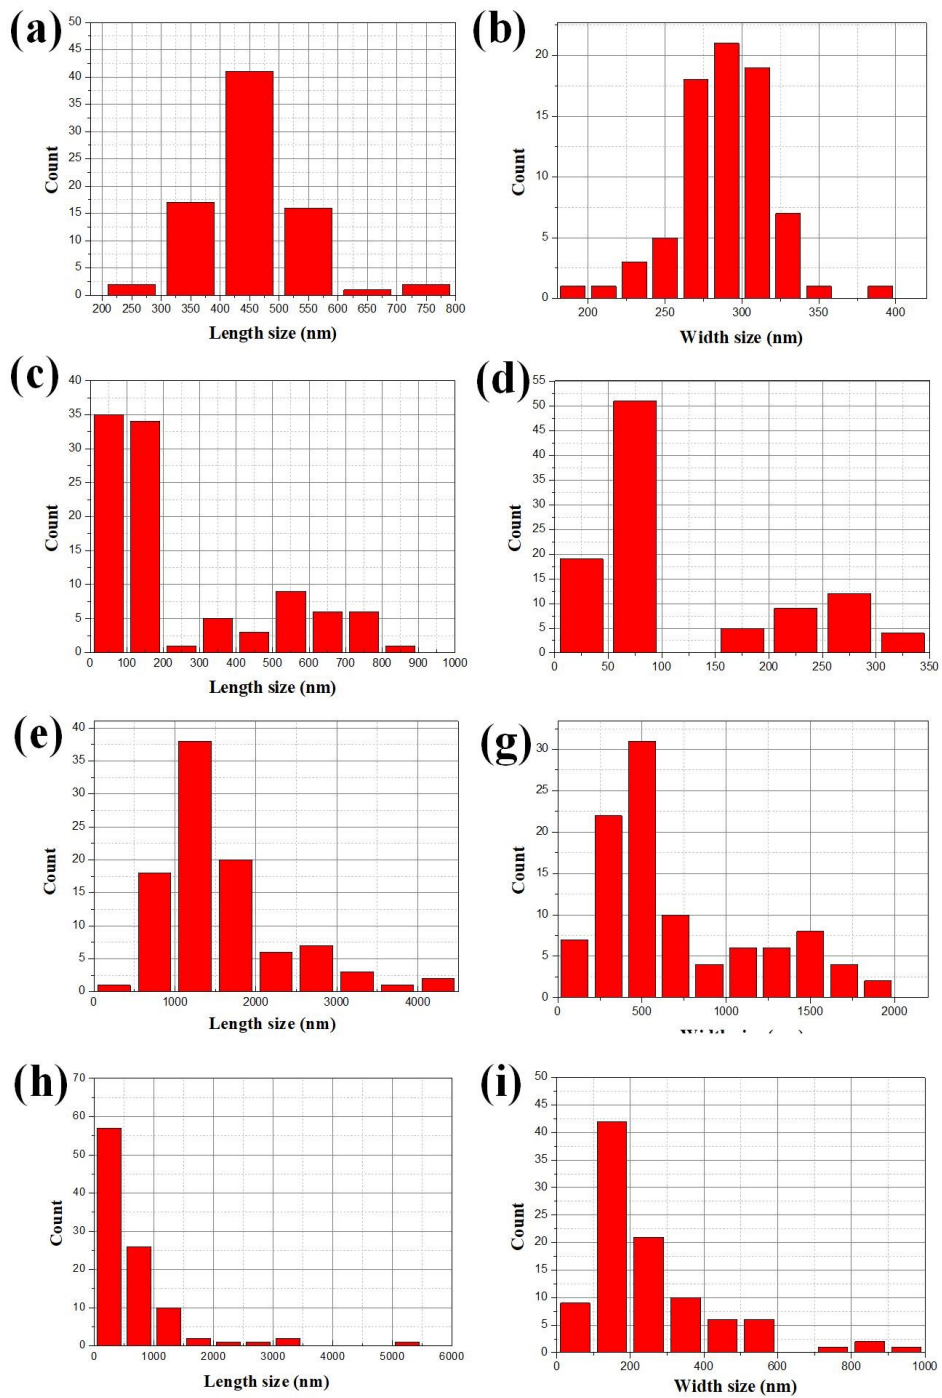

**Figure S1.** The distribution histogram of the MIL-88 series MOFs. (a) and (b): length and width of MIL-88A particles; (c) and (d): length and width of MIL-88B particles; (e) and (f): length and width of MIL-88C particles; (g) and (h): length and width of MIL-88D particles.

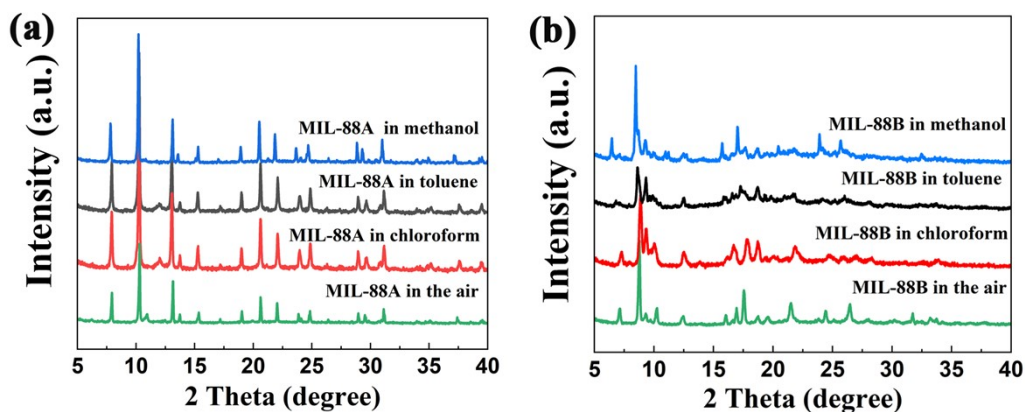

Figure S2. XRD patterns of the (a) MIL-88A/PVDF and (b) MIL-88B/PVDF in the air and several organic solvent.

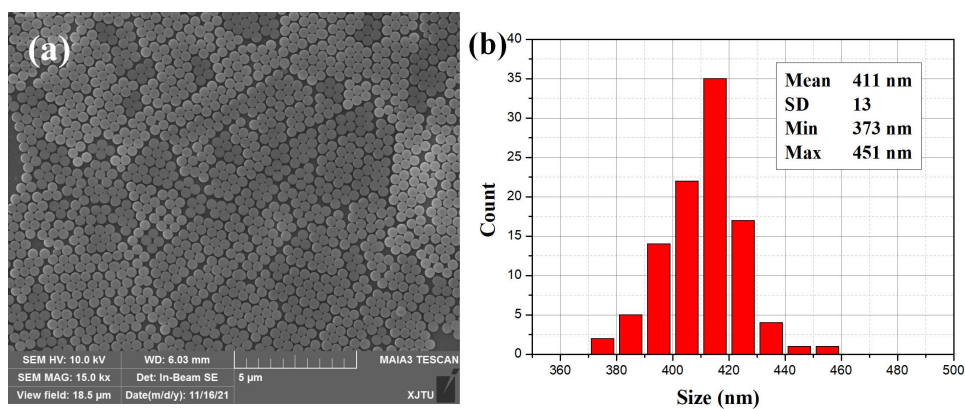

Figure S3. (a) SEM and (b) the distribution histogram of photonic crystal templates of SiO<sub>2</sub> with the average particle size of 411 nm.

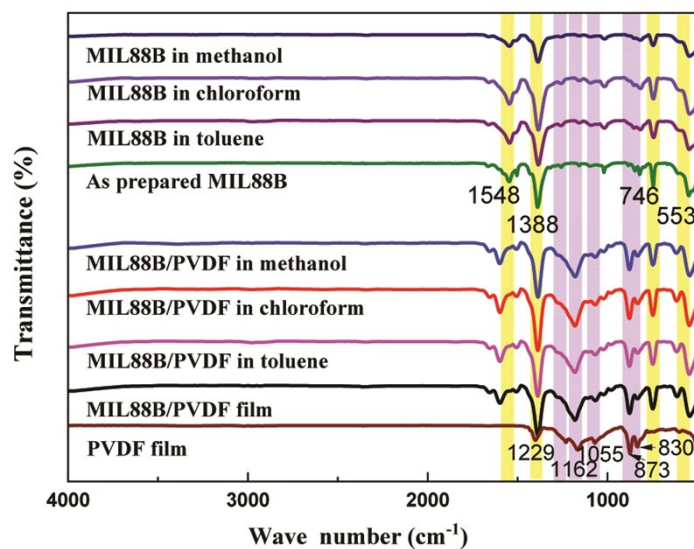

**Figure S4.** FTIR spectra of the as-prepared MIL88B and the MIL88B/PVDF film in the air and immersion in the methanol, chloroform and toluene, respectively. The FTIR spectra of the PVDF film was also given for comparison.

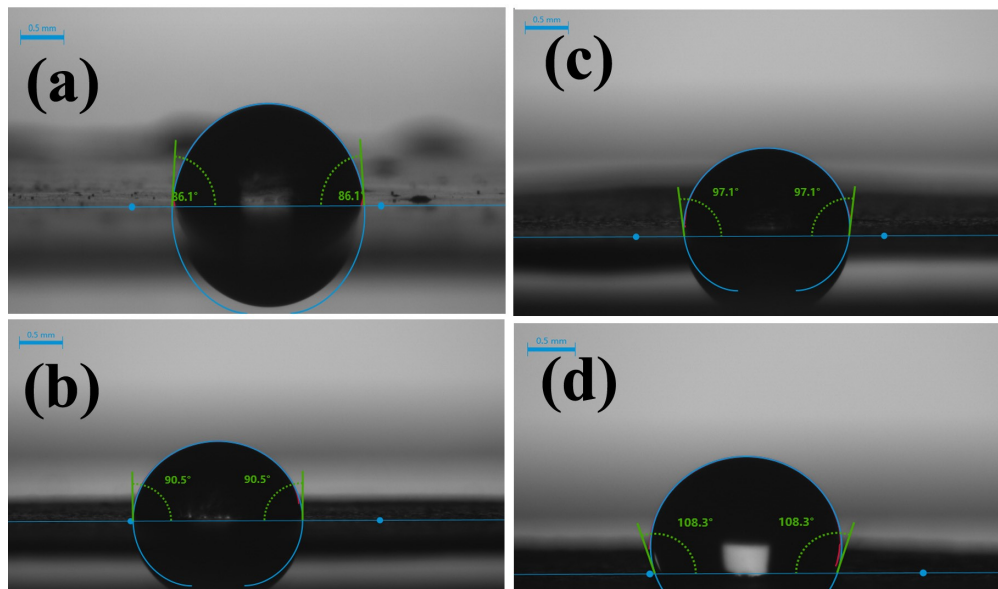

**Figure S5.** The film surface static contact angle of (a) MIL-88A/PVDF film; (b) MIL-88B/PVDF film; (c) MIL-88C/PVDF film and (d) MIL-88D/PVDF film.

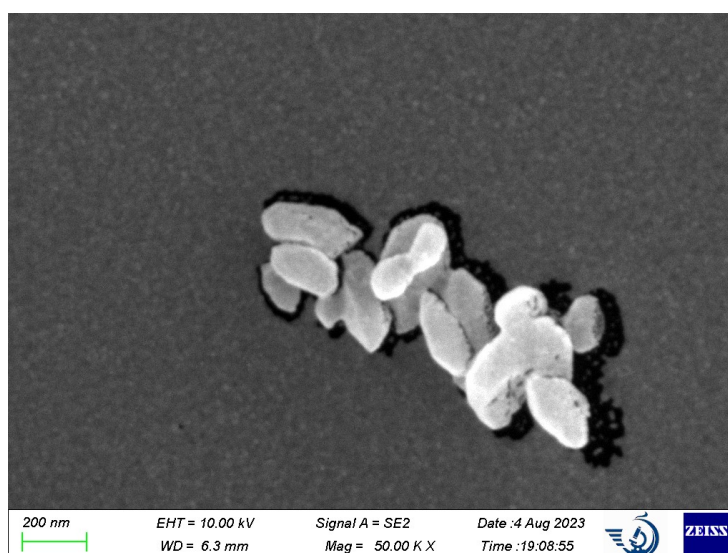

**Figure S6.** SEM of the crushed MIL-88B particles.
